1 **Exposure to bovine livestock and latent tuberculosis infection in children:**  
2 **investigating the zoonotic tuberculosis potential in a large urban and peri-urban**  
3 **area of Cameroon.**

4 Martine Augusta Flore Tsasse<sup>1, 2</sup>, Henry Dilonga Meriki<sup>1</sup>, Hugues Clotaire Nana  
5 Djeunga<sup>2</sup>, Marius Ambe Ngwa<sup>1</sup>, Henri Olivier Tatsilong Pambou<sup>1</sup>, Raïssa Dongmo <sup>2</sup>,  
6 Ouethy Nguessi<sup>3</sup>, Joseph Kamgno<sup>2, 4</sup>, Jane Françis Tatah Kihla Akoachere<sup>1</sup>, Patrick  
7 Nguipdop Djomo<sup>2, 5\*</sup>

8 <sup>1</sup>Department of Microbiology and Parasitology, Faculty of Science, University of Buea,  
9 Buea, Cameroon. <sup>2</sup>Higher Institute for Scientific and Medical Research (ISM),  
10 Yaoundé, Cameroon. <sup>3</sup>Ministry of Public Health, Jamot Hospital, Yaoundé, Cameroon.  
11 <sup>4</sup>Department of Public Health, Faculty of Medicine and Biomedical Sciences, University  
12 of Yaoundé I, Yaoundé, Cameroon. <sup>5</sup>Faculty of Epidemiology and Population Health,  
13 London School of Tropical Medicine and Hygiene, London, United Kingdom.

14 \*Corresponding author: [patrick.nguipdop-djomo@lshtm.ac.uk](mailto:patrick.nguipdop-djomo@lshtm.ac.uk) (PND)

15

## 16 **Abstract**

### 17 **Background:**

18 Bovine tuberculosis (bTB), a neglected zoonotic disease, is endemic in cattle in  
19 many Sub-saharan African countries, yet its contribution to tuberculosis (TB) burden is  
20 understudied. Rapid urbanisation and increase in demand for animal proteins,  
21 including dairy products, increases the risk of spill over. This study compared the latent  
22 tuberculosis infection (LTBI) risk in children, a proxy-measure for recent TB infection,  
23 in children living in high cattle density areas to children from the general population in  
24 Cameroon.

### 25 **Method:**

26 Cross-sectional study in the Centre Region of Cameroon in 2021, recruiting 160  
27 children aged 2-15 years, stratified by exposure to livestock, people treated for  
28 pulmonary TB (PTB) and the general community. Veinous blood was tested for LTBI  
29 using QuantiFERON–TB Gold-Plus. Prevalences were calculated and the association  
30 to exposure and other risk factors investigated using logistic regression models.

### 31 **Results:**

32 The crude LTBI prevalence were 8.2% in the general population, 7.3% in those  
33 exposed to cattle and 61% in pulmonary TB household contacts. After adjusting for  
34 confounding and sampling design, exposure to cattle and exposure to pulmonary TB  
35 were associated with higher risk of LTBI than the general population (respectively odds  
36 ratio (OR): 3.56, 95%CI: 0.34 to 37.03; and OR: 10.36, 95%CI: 3.13 to 34.21). Children  
37 frequently consuming cow milk had higher risk of LTBI (OR: 3.35; 95%CI 0.18 to  
38 60.94).

## 39 Conclusion:

40 Despite limited statistical power, this study suggests that children exposed to  
41 cattle in a setting endemic for bTB had higher risk of LTBI, providing indirect evidence  
42 that *Mycobacterium bovis* may contribute to TB burden.

43 **Key words:** bovine tuberculosis, neglected zoonotic diseases, Latent tuberculosis  
44 Infection, children, *Mycobacterium bovis*, Interferon Gamma Release Assays,  
45 Cameroon, Africa.

## 46 Author Summary

47 Tuberculosis (TB) is the top infectious disease killer worldwide. *Mycobacterium*  
48 *bovis* (*M. bovis*) is the most common zoonotic and second most common cause of TB  
49 in humans. The pathogen is naturally resistant to pyrazinamide, a key component of  
50 standard anti-tuberculosis treatment, thus can hamper TB control and elimination  
51 efforts. *M. bovis* is endemic in cattle in this setting, but there is limited information on  
52 its contribution to TB burden. We used a specific test, the Interferon Gamma Released  
53 Assay, to compare latent TB infection (LTBI) rates in a random sample of children with  
54 high exposure to cattle, to that of children from the general community and from  
55 households with known pulmonary TB patient in and around a major urban centre in  
56 Cameroon; LTBI in children provide insight on recent infection, thus transmission. After  
57 adjusting for background differences, we found that exposure to cattle was associated  
58 with over three times higher risk of LTBI compared to the general population (and  
59 household exposure associated with over 10 times higher risk of infection). Our results  
60 suggest that exposure to cattle (therefore *M. bovis*) contributes significantly to TB  
61 burden, and should be investigated thoroughly to support control efforts.

62

## 63 Introduction

64 *Mycobacterium bovis* (*M. bovis*) is the most common zoonotic, and second most  
65 common aetiologic cause of tuberculosis in humans after *Mycobacterium tuberculosis*  
66 (*M. tuberculosis*) [1,2]. Its natural resistance to pyrazinamide, a key component of TB  
67 standard treatment, and diagnostics difficulties, contribute to poorer treatment  
68 outcomes in patients and challenges to TB control programmes [3]. Cattle is the main  
69 animal reservoir, though *M. bovis* can also be found in a range of other mammals [4-  
70 6]. In sub-Saharan Africa, including Cameroon, strong evidence suggest that the  
71 burden of bovine tuberculosis (bTB) is on the rise , partly due to the intensification of  
72 cattle livestock farming to meet the increasing demands to higher rates of urbanisation.  
73 A 2016 study which sampled over 2300 bovine carcasses in abattoirs across the four  
74 main areas of livestock farming in Cameroon found a high prevalence of *M. bovis*  
75 ranging from about 3% in the North West region to over 21% in the Northern Region,  
76 as well as a non-negligible prevalence of non-tuberculous mycobacteria [7]. The study  
77 also reported a wide genetic diversity, and evidence of recent and expanding *M. bovis*  
78 transmission in intensive dairy farming areas in the North-West region [8].

79 Rapid urbanisation and increased demand for fresh dairy products has been  
80 driving a rapid expansion of the local dairy farming industry in many sub-Saharan  
81 African countries, contributing to the increased potential risk of zoonotic TB in the  
82 general population, beyond the occupational risk often limited to livestock workers. The  
83 World Health Organization (WHO) estimates the highest morbidity and mortality due  
84 to zoonotic TB, occurs in its African region, which is likely severely underestimated due  
85 to diagnostic limitations [1]. Unfortunately, in Cameroon, like most sub-Saharan African  
86 countries , zoonotic TB remains largely neglected [9], with control limited to regulatory

87 inspection of animal carcasses at the point of slaughter, mandated carcass destruction  
88 and recommended milk pasteurisation, often poorly enforced.

89 Despite high bovine TB prevalence, very little data exist on the impact on human  
90 population health, and its contribution to TB burden in Cameroon which limits advocacy  
91 efforts as well adequate planning and tailored control efforts [10]. Routine TB  
92 diagnosis platforms (microscopy, culture and Gene-Xpert) are mostly focused on  
93 pulmonary tuberculosis, and unable to differentiate *M. bovis* from *M. tuberculosis*.  
94 Besides, the natural history and long latency period between *Mycobacterium* infection  
95 (Latent Tuberculosis infection - LTBI) and the onset of active disease complicates  
96 correlating human disease burden from routine surveillance with contemporaneous  
97 animal epidemiology. Conversely, LTBI in children is a reliable indicator of recent  
98 *Mycobacterium* transmission [10]. We conducted a pilot study to compare the LTBI risk  
99 in children living in areas with high cattle density to that in children sampled from the  
100 general population, in and around Yaoundé, the capital and second-largest city of  
101 Cameroon. We hypothesized that higher *M. bovis* transmission and burden would be  
102 reflected by higher LTBI risk in children with more exposure to cattle and consumption  
103 of fresh cow-milk dairy products.

104

## 105 **Methods**

### 106 **1. Study design, setting , participants and Ethical** 107 **consideration:**

#### 108 **1.1 Study design, setting and participants**

109 This cross-sectional study was conducted from December 2020 to February  
110 2021. Participants were children aged 2 to 15-year-old with no history of diagnosis or  
111 treatment for tuberculosis; younger children under 2 year-old were not included due to  
112 low acceptability of blood sample collection. Participants were selected using  
113 systematic random sampling, stratified by age groups (2 to 5-year-old, 6 to 10-year-old  
114 and 11 to 15-year-old), sex, and place of residence (urban and peri-urban area), and  
115 from three TB exposure groups, respectively:

- 116 (i) children with regular exposure to cattle: selected from the peri-urban area  
117 (Efoulan in Akonolinga health district) where a large population of nomadic  
118 Mbororo Fulani engages in livestock keeping;
- 119 (ii) children from the general population, selected from Emana, Yaoundé  
120 (urban) and Menguem-si, Akonolinga (peri-urban);
- 121 (iii) children from households with known pulmonary tuberculosis (PTB) cases;  
122 this group was selected to estimate LTBI prevalence in children with known  
123 recent and high exposure to TB. PTB patients under treatment, with eligible  
124 children in their household, were identified from Yaoundé's principal TB  
125 treatment centre (Jamot Hospital).

#### 126 **1.2. Ethical consideration**

127 Written informed consent was obtained from parents or legal guardians, and  
128 verbal assent from children aged over 12-year-old and participant confidentiality was  
129 respected throughout the study. The study was approved by the ethics committee of  
130 the Human Health Research Council of the Centre Region in Cameroon (EC  
131 N01903/CRERSHC/2020). Administrative authorisations were also obtained for each  
132 study site.

## 133 **2. Data collection:**

134 A face-to-face structured questionnaire was administered using the Open Data  
135 Kit suite (ODK) on a tablet computer, to collect information on participants' socio-  
136 demographic characteristics including parental education and assets ownership,  
137 vaccination history, respiratory health history, exposure to cattle, consumption of fresh  
138 cow-milk dairy products, and household history of tuberculosis. Their upper arm was  
139 also examined for the BCG vaccine scar, with a brief clinical examination for signs of  
140 active tuberculosis.

141 We also collected from each participant 5ml of peripheral venous blood in a  
142 sodium heparin tube to diagnose latent TB infection using the Quantiferon-TB Gold  
143 Plus (QTF-plus) Interferon Gamma Released Assay (IGRA) (Qiagen Strasse,  
144 Germany). This assay measures the cell-mediated immune response elicited by  
145 infection with Mycobacterium tuberculosis complex, including *M. bovis*, using a mixture  
146 of early secretory antigenic peptide-6 (ESAT-6) and culture filtrate protein-10(CFP-10)  
147 antigens; this antigen mixture allows the assay to distinguish infected individuals from  
148 those uninfected, with and without Bacille Calmette and Guerin( BCG)-vaccination [11].  
149 Stool samples were also collected to screen intestinal helminth parasites, as there has  
150 been suggestions that they can interfere with the IGRA response [12].

151 The blood samples were kept in the field in an ice box (0 to 4°C) and transported  
152 to the laboratory on the same day. For each sample, 1ml of blood was immediately  
153 transferred into each of four QuantiFERON-TB Gold Plus tubes (Nil tube, TB1 tube,  
154 TB2 tube, and Mitogen tube) and incubated for 24 hours at 37°C temperature. The  
155 tubes were then centrifuged at 3000G for 15 minutes, the plasma was collected,  
156 aliquoted and frozen at -20°C until analysis. At the end of field data collection, the  
157 stimulated plasma samples were analysed using quantitative Enzyme Linked Immuno-  
158 Assays (ELISA) according to the manufacturer's instructions. The manufacturer's  
159 software was then used to interpret the raw optical densities data, including the assay  
160 validation and quality control, and computation of interferon gamma (IFN- $\gamma$ )  
161 concentration in international units per millilitre (IU/ml). A positive IGRA result was  
162 defined as valid assay with IFN- $\gamma$  released concentration  $\geq$  0.35 IU/ml after blood  
163 stimulation with mycobacterial antigens.

### 164 **3. Statistical analysis:**

165 The primary outcome, LTBI, was defined as a positive QFT-plus result with no  
166 clinical sign of active tuberculosis. The main exposure was categorised into three TB  
167 groups: exposure to a known TB case through household membership, frequent  
168 exposure to livestock, with children from the general community being the comparison  
169 baseline. We also performed exploratory analyses for the association between various  
170 participant characteristics and LTBI.

171 The questionnaire data was cleaned and coded, then consistency and range-  
172 checks performed to check the data quality and correct data-entry mistakes. The  
173 distribution of categorical variables was examined, with some categories merged as  
174 required to the small sample size. We performed descriptive analyses using simple



175 cross-tabulations, looking at the distribution of various characteristics in the study  
176 participants. Principal Component Analysis (PCA) was used to combine information on  
177 assets ownership into a socio-economic score [13]; assets used in the score included  
178 ownership of a television, cable TV, computer, smartphone, fridge, gas stove, and the  
179 house building material and number of bedrooms. The PCA predicted score was  
180 categorised into lower versus higher socio-economic status.

181 We calculated the crude LBTI prevalence (without adjusting for sampling  
182 stratifying variable age, sex, and place of residence), tabulated against participant's  
183 characteristics, and we investigated its association with the TB exposure group and  
184 other participants' characteristics. The magnitude of association was measured using  
185 Odds Ratios (ORs) and 95% confidence intervals (95% CI). First, we computed  
186 minimally adjusted ORs (and 95% CI) of association between LTBI and variables,  
187 controlling for age, sex and place of residence. We then built a fuller multivariable  
188 logistic regression model, further adjusting for confounding by other participant  
189 characteristics. The model was constructed using a forward stepwise approach,  
190 starting with the minimally adjusted model (including TB exposure group, age group,  
191 sex and place of residence as a priori confounders), then adding other variables in turn  
192 and checking their introduction did not cause data sparsity or collinearity.

193 We also did a subgroup analysis excluding children with exposure to TB patients  
194 in their household, thus restricted to those exposed to livestock and from the general  
195 community, to investigate the association between consumption of fresh cow-milk dairy  
196 product and raw meat and LTBI.

197 All statistical tests of association were done using the likelihood ratio test  
198 (LRT), and OR and 95% CI were obtained using maximum likelihood estimation.  
199 Statistical analyses were conducted using Stata 17.

## 200 Results

### 201 1. Participant's characteristics:

202 We recruited 160 children, respectively 41 (26%) with frequent exposure to  
203 livestock, 46 (29%) from households with a TB case, and 73 (45%) from the general  
204 community. 89 (56%) study participants were female, and 68 (42%) were aged 2 to 5-  
205 year-old. About half the participants lived in the urban area, and 50% were BCG  
206 vaccinated, although vaccine uptake was noticeably lower in children exposed to  
207 livestock (2.4% versus 67.1% in general community children and 63.0% in household  
208 contacts). Only 7 (4.4%) children had evidence of intestinal helminths in their stool.  
209 The consumption of dairy products from fresh cow milk was more common in children  
210 exposed to livestock (98%). The detailed characteristics of participants are presented  
211 in Table 1.

212

213

214

215

216

217

218

219

220

221

222 **Table 1. Characteristics of study participants overall and by exposure group.**

| Variables                                | Overall (%) | General community (%) | Exposed Livestock (%) | Household exposure (%) |
|------------------------------------------|-------------|-----------------------|-----------------------|------------------------|
| <b>Age group (Years)</b>                 |             |                       |                       |                        |
| [2-5]                                    | 68 (42.5)   | 29 (39.7)             | 19 (46.3)             | 20 (43.5)              |
| [6-10]                                   | 54 (33.7)   | 26 (35.6)             | 14 (34.1)             | 14 (30.4)              |
| [11-15]                                  | 38 (23.7)   | 18 (24.7)             | 8 (19.5)              | 12 (26.1)              |
| <b>Sex</b>                               |             |                       |                       |                        |
| Female                                   | 89 (55.6)   | 40 (54.8)             | 24 (58.5)             | 25 (54.3)              |
| Male                                     | 71 (44.4)   | 33 (45.2)             | 17 (41.5)             | 21 (45.6)              |
| <b>Residence area</b>                    |             |                       |                       |                        |
| Peri-urban                               | 81 (50.6)   | 40 (54.8)             | 41 (100)              | 0 (0)                  |
| Urban                                    | 79 (49.4)   | 33 (45.2)             | 0 (0)                 | 46 (100)               |
| <b>Socio-economic level</b>              |             |                       |                       |                        |
| Low                                      | 82 (51.2)   | 38 (52.0)             | 41 (100)              | 3 (6.5)                |
| High                                     | 78 (48.7)   | 35 (47.9)             | 0 (0)                 | 43 (93.5)              |
| <b>Head of household education level</b> |             |                       |                       |                        |
| Primary                                  | 82 (51.2)   | 29 (39.7)             | 41 (100)              | 12 (26.1)              |
| Secondary                                | 78 (48.7)   | 44 (60.3)             | 0 (0)                 | 34 (73.9)              |
| <b>BCG vaccination status</b>            |             |                       |                       |                        |
| No                                       | 81 (50.6)   | 24 (32.9)             | 41 (97.6)             | 17 (37)                |
| Yes                                      | 79 (49.4)   | 49 (67.1)             | 1 (2.4)               | 29 (63.0)              |
| <b>Household cattle ownership</b>        |             |                       |                       |                        |
| No                                       | 11 (73.7)   | 73 (100)              | 0 (0)                 | 45 (97.8)              |
| Yes                                      | 42 (26.3)   | 0 (0)                 | 41 (100)              | 1 (2.2)                |
| <b>Stool parasites results</b>           |             |                       |                       |                        |
| Negative                                 | 153 (9.2)   | 67 (91.8)             | 41 (100)              | 45 (97.8)              |
| Positive                                 | 7 (4.4)     | 6 (8.2)               | 0 (0)                 | 1 (2.2)                |
| <b>Consumption of boiled cow milk</b>    |             |                       |                       |                        |
| No                                       | 117 (73.1)  | 72 (8.6)              | 1 (2.4)               | 44 (95.6)              |
| Yes                                      | 43 (26.9)   | 1 (1.4)               | 40 (97.6)             | 2 (4.3)                |
| <b>Consumption of crude cow milk</b>     |             |                       |                       |                        |
| No                                       | 154 (96.2)  | 72 (98.6)             | 37 (90.2)             | 45 (97.8)              |
| Yes                                      | 6 (3.7)     | 1 (1.4)               | 4 (9.8)               | 1 (2.2)                |

223 **2. Latent tuberculosis infection prevalence and risk factors:**

224 Overall, the prevalence of latent tuberculosis infection in our study participants

225 was 23.1% (37/160). Before adjusting for the sampling stratifying variables age, sex

226 and place of residence, the crude prevalence was respectively 60.9% (28/46) in  
 227 children exposed to a TB patient in their household, 7.3% (3/41) in children exposed  
 228 to livestock and 8.2% (6/73) in children randomly selected from the community. The  
 229 prevalence was higher in male (25.4%) than female (21.4%), and about twice as high  
 230 in older 11-15 years old children (36.8%) than younger 6-10 years (18.5%) and 2-5  
 231 years (19.1%) children. We also found a higher prevalence in children from urban  
 232 areas (41.8%) than peri-urban areas (4.9%). The crude LTBI prevalence by study  
 233 characteristics is presented in Table 2.

234 **Table 2. Crude prevalence of latent tuberculosis infection by participants'**  
 235 **characteristics.**

| Variables                                | N   | IGRA positive (%) |
|------------------------------------------|-----|-------------------|
| <b>Exposure group</b>                    |     |                   |
| General community                        | 73  | 6 (8.22%)         |
| Exposed to Livestock                     | 41  | 3 (7.32%)         |
| Household exposure                       | 46  | 28 (60.87%)       |
| <b>Age group (years)</b>                 |     |                   |
| [2-5 ]                                   | 68  | 13 (19.12%)       |
| [6-10 ]                                  | 54  | 10 (18.52%)       |
| [11-15 ]                                 | 38  | 14 (36.84%)       |
| <b>Sex</b>                               |     |                   |
| Female                                   | 89  | 19 (21.35%)       |
| Male                                     | 71  | 18 (25.35%)       |
| <b>Residence area</b>                    |     |                   |
| Peri-urban                               | 81  | 4 (4.94%)         |
| Urban                                    | 79  | 33 (41.77%)       |
| <b>Socio-economic level</b>              |     |                   |
| Low                                      | 82  | 6 (7.32%)         |
| High                                     | 78  | 31 (39.74%)       |
| <b>Head of household education level</b> |     |                   |
| Primary                                  | 82  | 11 (13.41%)       |
| Secondary                                | 78  | 26 (33.33%)       |
| <b>BCG vaccination status</b>            |     |                   |
| No                                       | 81  | 18 (22.22%)       |
| Yes                                      | 79  | 19 (24.05%)       |
| <b>Consumption of boiled cow milk</b>    |     |                   |
| No                                       | 117 | 33 (28.21%)       |
| Yes                                      | 43  | 4 (9.30%)         |

236

237           After adjusting for age, sex and place of residence, there was evidence of  
238 association between the exposure group and LTBI ( $p < 0.001$ ), with higher risk of LTBI  
239 in children exposed to livestock (OR: 3.56, 95% CI: 0.34 to 37.03) and those exposed  
240 to TB patient in their household (OR: 10.36, 95% CI: 3.13 to 34.21), compared to  
241 children from the general community. These associations remained mostly unchanged  
242 after further adjustment for socio-economic level, head of household education level  
243 and BCG vaccination status. The odds of LTBI also appeared higher in children from  
244 urban area than peri-urban area (fully adjusted OR: 7.39, 95% CI: 0.58 to 94.73,  $p =$   
245 0.092), and increased with age (fully adjusted OR: 1.06, 95% CI: 0.32 to 3.47; and OR:  
246 3.59, 95% CI: 1.03 to 12.60), respectively in 6-10 years and 11-15 years compared to  
247 2-5 years, and  $p$ -value for trend =0.056. BCG vaccination was associated with lower  
248 risk of LTBI, albeit with wide confidence interval (fully adjusted OR: 0.53, 95% CI 0.17  
249 to 1.65). Full results are in Table 3.

250

251

252

253

254

255

256

257

258

259 **Table 3. Association between participants' characteristics and latent**  
 260 **tuberculosis infection.**

| Variable                                 | Crude OR | 95% CI       | p-value | Adjusted OR | 95% CI       | p-value |
|------------------------------------------|----------|--------------|---------|-------------|--------------|---------|
| <b>Exposure group</b>                    |          |              |         |             |              |         |
| General community                        | 1        |              |         | 1           |              |         |
| Exposed to Livestock                     | 3.56     | 0.34 - 37.03 | < 0.001 | 3.59        | 0.28 - 45.52 | < 0.001 |
| Household exposure                       | 10.36    | 3.13 - 34.21 |         | 10.11       | 2.98 - 34.35 |         |
| <b>Age group (years)</b>                 |          |              |         |             |              |         |
| [2-5]                                    |          |              |         | 1           |              |         |
| [6-10]                                   | 0.88     | 0.32 - 2.43  | 0.111   | 1.06        | 0.32 - 3.47  | 0.056   |
| [11-15]                                  | 2.44     | 0.87 - 6.79  |         | 3.59        | 1.03 - 12.60 |         |
| <b>Sex</b>                               |          |              |         |             |              |         |
| Female                                   | 1        |              |         | 1           |              |         |
| Male                                     | 1.36     | 0.58 - 3.19  | 0.474   | 1.22        | 0.45 - 3.26  | 0.686   |
| <b>Residence area</b>                    |          |              |         |             |              |         |
| Peri-urban                               | 1        |              |         | 1           |              |         |
| Urban                                    | 14.18    | 4.65 - 43.22 | < 0.001 | 7.39        | 0.58 - 94.73 | 0.092   |
| <b>Socio-economic level</b>              |          |              |         |             |              |         |
| Low                                      | 1        |              |         | 1           |              |         |
| High                                     | 1.41     | 0.34 - 5.88  | 0.633   | 0.95        | 0.15 - 5.87  | 0.948   |
| <b>Head of household education level</b> |          |              |         |             |              |         |
| Primary                                  | 1        |              |         | 1           |              |         |
| Secondary                                | 1.35     | 0.51 - 3.58  | 0.545   | 1.90        | 0.54 - 6.65  | 0.312   |
| <b>BCG vaccination status</b>            |          |              |         |             |              |         |
| No                                       | 1        |              |         | 1           |              |         |
| Yes                                      | 0.41     | 0.16 - 1.08  | 0.068   | 0.53        | 0.17 - 1.65  | 0.274   |

261

262 In the subgroup analysis excluding children exposed to TB patients in their

263 household, we found higher odds of LTBI in children who reported frequent

264 consumption of boiled cow milk, though numbers were small, and the confidence

265 interval was wide (fully adjusted OR: 3.35; 95% CI :0.18 to 60.94) ( Table 4.).

267 **Table 4. Association between consumption of fresh cow-milk products, raw**  
 268 **meat, and latent tuberculosis infection in children exposed to livestock and from**  
 269 **the general community.**

| Variable           | LTBI prevalence (%) | Crude OR | 95% CI       | p-value | Ajusted OR | 95% CI       | p-value |
|--------------------|---------------------|----------|--------------|---------|------------|--------------|---------|
| <b>Boiled milk</b> |                     |          |              |         |            |              |         |
| <b>No (n=73)</b>   | 6 (8.22%)           | 1        |              |         | 1          |              |         |
| <b>Yes (n=41)</b>  | 3 (7.32%)           | 2.07     | 0.29 - 14.52 | 0.462   | 3.35       | 0.18 - 60.94 | 0.413   |
| <b>Yoghurt</b>     |                     |          |              |         |            |              |         |
| <b>No (n=102)</b>  | 8 (7.84%)           | 1        |              |         | 1          |              |         |
| <b>Yes (n=12)</b>  | 1 (8.33%)           | 0.94     | 0.15 - 5.67  | 0.943   | 0.89       | 0.13 - 5.94  | 0.905   |
| <b>Raw meat</b>    |                     |          |              |         |            |              |         |
| <b>No(n=80)</b>    | 7 (8.75%)           | 1        |              |         | 1          |              |         |
| <b>Yes (n=34)</b>  | 2 (5.88%)           | 0.48     | 0.05 - 4.82  | 0.535   | 0.32       | 0.02 - 4.68  | 0.406   |

270

## 271 **Discussion**

272 This pilot study contributes some insights in the potential contribution of bovine  
 273 tuberculosis, a neglected zoonosis, to TB burden in Cameroon, especially in children.  
 274 Key findings were suggestions that after adjusting for confounding, children with  
 275 frequent exposure to cattle may have over three-time higher risk of LTBI than those  
 276 from the general community. Despite our study's modest power, these results, in a  
 277 context where Bovine TB( bTB) is endemic and highly prevalent in cattle, are consistent  
 278 with the hypothesis of spill over to human populations, thus contributing to the TB  
 279 burden. There is limited data on the true burden of bTB in human populations in Africa,  
 280 but the results are also aligned with reports from other sub-Saharan African settings  
 281 where higher TB rates have been observed in pastoral populations or with occupational  
 282 exposure, 21% compared to the general population[14]. The LTBI prevalence in  
 283 children exposed to cattle husbandry in this study is however lower than what has been

284 reported in people with occupational risk: Torres and colleagues in Mexico reported  
285 58.5% of individuals with latent TB infection [15]; Catalina and associates reported in  
286 a group of 674 agricultural workers exposed to livestock in Columbia 10.7% [16]. The  
287 difference likely reflect different populations and exposure, with the later groups mostly  
288 made of adults working closely and frequently with cattle, thus more exposed.

289 Subgroup analyses showed that the consumption of cow's milk was associated  
290 with higher risk of infection in our study population. This is a common practice in  
291 pastoralist communities [17,18], and a cheap and readily available source of nutrients  
292 for developing children. It suggests that exposure to contaminated cow food products,  
293 especially milk, could be an important bTB transmission route in our target population.  
294 If confirmed, this finding offers practical targets for risk mitigating public health actions.

295 An incidental finding in our pilot study is the very high (61%) LTBI prevalence in  
296 children exposed to PTB cases in their households. There is limited data measuring  
297 LTBI using IGRA in children household contacts. Data from a high TB burden province  
298 in South Africa, using the Tuberculin Skin Test (TST) which is less specific, reported  
299 lower LTBI prevalence of around 20% in children under 15 years [19]. The higher  
300 prevalence in our study could reflect delays in pulmonary TB patients seeking care, or  
301 challenges in the implementation of national TB policies regarding the screening and  
302 prophylactic treatment of household contacts; this finding should be explored further  
303 and may offer additional insights into factors contributing to persisting high TB rates in  
304 urban settings despite control efforts.

305 To the best of our knowledge, this study is the first to investigate LTBI among  
306 children in Cameroon using IGRA. Participants were recruited during the Covid-19  
307 pandemic when restrictions were in place to minimise social mixing; this presented  
308 challenges with response rate and implementation, partly explaining the small sample



309 size. There was however no suggestion that non-response was different between the  
310 targeted subgroups, therefore mostly leading to study low statistical power, rather than  
311 biased results. The small study size also limited or ability to explore the association  
312 with levels of exposure in more details. Using IGRA, especially the QFT-plus assay  
313 offered higher specificity in the identification of LTBI patients compared to studies using  
314 TST, in a population with high BCG vaccination coverage, and we also checked for  
315 intestinal helminths to account for any interference with assays. We were also able to  
316 adjust analysis for several confounders, including BCG vaccination and socio-  
317 economic level. It is possible that there was residual confounding, given we only used  
318 approximate measures such as the BCG scar rather than vaccination records, and  
319 assets ownership; but their confounding effect appeared modest, so it is unlikely  
320 residual confounding would have biased the results. In summary, while we appreciate  
321 the limitations of this pilot study, notably its limited statistical precision, we believe it  
322 does provide invaluable data on an understudied and neglected, yet important public  
323 health issue.

## 324 **Conclusion**

325 Overall, by showing higher LTBI risk in children exposed to cattle than the from  
326 general population, our study provides indirect evidence in support of the hypothesis  
327 that bovine tuberculosis may contribute to the TB burden in Cameroon. This should be  
328 explored in a larger study, including a follow-up component to monitor progression to  
329 active tuberculosis which could allow the confirmation of *M. bovis* as the etiologic agent  
330 and an estimation of its net contribution to disease burden. We would also advise the  
331 Cameroon National TB control programme to further investigate the seemingly high

332 LTBI prevalence in children household contacts of people with pulmonary tuberculosis,  
333 as part of its efforts to reduce TB transmission.

## 334 **Acknowledgments**

335 We would like to acknowledge and thank all study participants and their families,  
336 without whose generous cooperation this study would not be possible. We also thank  
337 the head of the Laboratory of Tuberculosis Research Kolbisson (Professor Penlap  
338 Beng Véronique) manager of the Wise project Cameroon. We also thank the Directors  
339 of the Jamot hospital in Yaounde, the Akonolinga, Djoungolo and Nkoldongo health  
340 districts. We thank all the colleagues and personnel who have contributed to this work,  
341 including, Djune Yemeli Linda for her assistance with her materials; Mbickmen Tchana  
342 Steve, Balog Aubin, Bamou Heumou Louis Rolf, Mbakam Laetitia for their laboratory  
343 support; Achobi Alain and Youssoufa for their always presence in the field.

## 344 **Authors' contributions**

345 PND conceives the study; MAFT and PND designed the study protocol, with  
346 input from HCND, JK, JFTK and HDM. MAFT, HOTP, RD and MON performed field  
347 data collection under supervision from PND; MAFT, MAN and PND conducted  
348 statistical analyses. MAFT and PND prepared the manuscript, with contribution from  
349 all co-authors.

## 350 **Conflicts of interest**

351 The authors declare that they have no conflict of interests

352

353

## 354 References

- 355 1. Olea-Popelka F, Muwonge A, Perera A, Dean AS, Mumford E, et al. (2017) Zoonotic tuberculosis in  
356 human beings caused by *Mycobacterium bovis*-a call for action. *Lancet Infect Dis* 17: e21-  
357 e25.
- 358 2. Meisner J, Curtis K, Graham TW, Apamaku MB, Manhart LE, et al. (2019) Cattle-associated risk  
359 factors for human tuberculosis in rural livestock-keeping communities, Uganda. *Zoonoses  
360 Public Health* 66: 73-82.
- 361 3. Hannan MM, Desmond EP, Morlock GP, Mazurek GH, Crawford JT (2001) Pyrazinamide-  
362 mono-resistant *Mycobacterium tuberculosis* in the United States. *J Clin Microbiol* 39: 647-  
363 650.
- 364 4. Wobeser G (2009) Bovine tuberculosis in Canadian wildlife: an updated history. *Can Vet J* 50: 1169-  
365 1176.
- 366 5. de Garine-Wichatitsky M, Caron A, Gomo C, Foggin C, Dutlow K, et al. (2010) Bovine tuberculosis in  
367 buffaloes, Southern Africa. *Emerg Infect Dis* 16: 884-885.
- 368 6. Himsworth CG, Elkin BT, Nishi JS, Neimanis AS, Wobeser GA, et al. (2010) An outbreak of bovine  
369 tuberculosis in an intensively managed conservation herd of wild bison in the Northwest  
370 Territories. *Can Vet J* 51: 593-597.
- 371 7. Egbe NF, Muwonge A, Ndip L, Kelly RF, Sander M, et al. (2016) Abattoir-based estimates of  
372 mycobacterial infections in Cameroon. *Sci Rep* 6: 24320.
- 373 8. Egbe NF, Muwonge A, Ndip L, Kelly RF, Sander M, et al. (2017) Molecular epidemiology of  
374 *Mycobacterium bovis* in Cameroon. *Sci Rep* 7: 4652.
- 375 9. World Health Organization (2006) The control of neglected zoonotic diseases - A route to poverty  
376 alleviation: Report of a Joint WHO/DFID-AHP Meeting with the participation of FAO and  
377 OIE Geneva, 20 and 21 September 2005. Geneva.
- 378 10. Rieder HL (1999) Epidemiologic basis of tuberculosis control. Paris: International Union Against  
379 Tuberculosis and Lung Disease.
- 380 11. Mustafa AS (2021) Immunological Characterization of Proteins Expressed by Genes Located in  
381 *Mycobacterium tuberculosis*-Specific Genomic Regions Encoding the ESAT6-like Proteins.  
382 *Vaccines (Basel)* 9.
- 383 12. Babu S, Nutman TB (2016) Helminth-Tuberculosis Co-infection: An Immunologic Perspective.  
384 *Trends Immunol* 37: 597-607.
- 385 13. Vyas S, Kumaranayake L (2006) Constructing socio-economic status indices: how to use principal  
386 components analysis. *Health Policy and Planning* 21: 459-468.
- 387 14. Mia MM, Hasan M, Pory FS (2022) Occupational exposure to livestock and risk of tuberculosis and  
388 brucellosis: A systematic review and meta-analysis. *One Health* 15: 100432.
- 389 15. Torres-Gonzalez P, Soberanis-Ramos O, Martinez-Gamboa A, Chavez-Mazari B, Barrios-Herrera  
390 MT, et al. (2013) Prevalence of latent and active tuberculosis among dairy farm workers  
391 exposed to cattle infected by *Mycobacterium bovis*. *PLoS Negl Trop Dis* 7: e2177.
- 392 16. Muñoz C, Rueda J, Botero LE, Mejía GI, Cardona X, et al. (2019) Tuberculosis in farm workers  
393 exposed to dairy and beef livestock in Colombia. *bioRxiv*: 821751.
- 394 17. Silva MR, Rocha ADS, Araújo FR, Fonseca-Júnior AA, Alencar AP, et al. (2018) Risk factors for  
395 human *Mycobacterium bovis* infections in an urban area of Brazil. *Mem Inst Oswaldo Cruz*  
396 113: e170445.
- 397 18. Devi KR, Lee LJ, Yan LT, Syafinaz AN, Rosnah I, et al. (2021) Occupational exposure and challenges  
398 in tackling *M. bovis* at human-animal interface: a narrative review. *Int Arch Occup Environ  
399 Health* 94: 1147-1171.
- 400 19. Ncayiyana JR, Bassett J, West N, Westreich D, Musenge E, et al. (2016) Prevalence of latent  
401 tuberculosis infection and predictive factors in an urban informal settlement in  
402 Johannesburg, South Africa: a cross-sectional study. *BMC Infect Dis* 16: 661.
